# Supplementary material
Source: PubMed Central journal article supplement (PMC5811323)
Supplement: NIHMS928546-supplement-Supp_info.pdf [file NIHMS928546-supplement-Supp_info.pdf]

## Supporting Figures

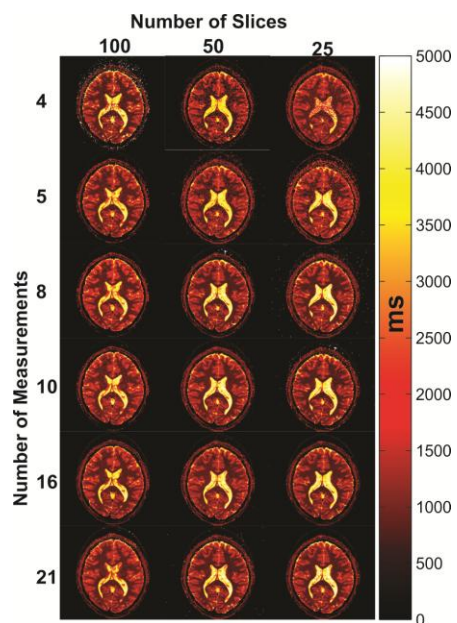

**Supporting Fig. S1.** Reconstructed  $T_1$  maps for a representative slice for all measurements for the 100, 50 and 25 slices case.

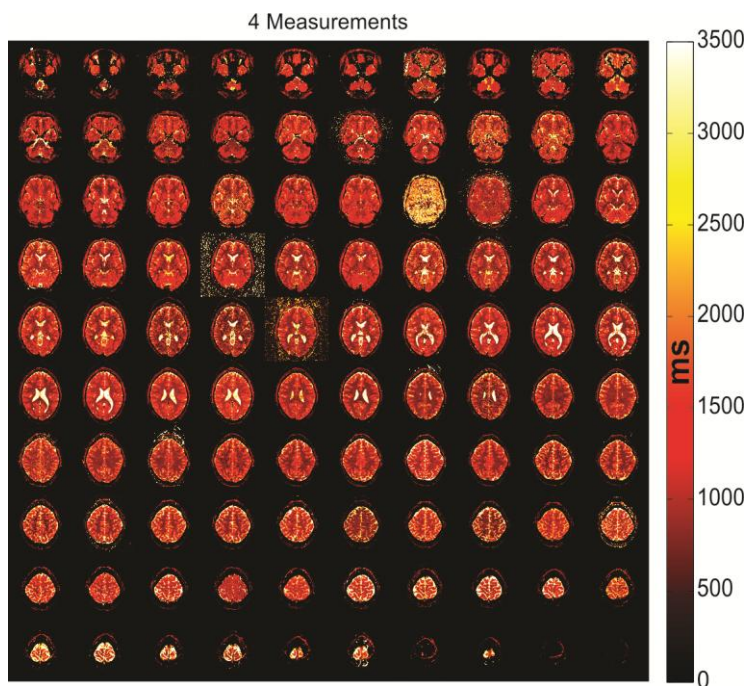

**Supporting Fig. S2.** Reconstructed  $T_1$  maps of 100 slices acquired with the optimized 4-measurement protocol.

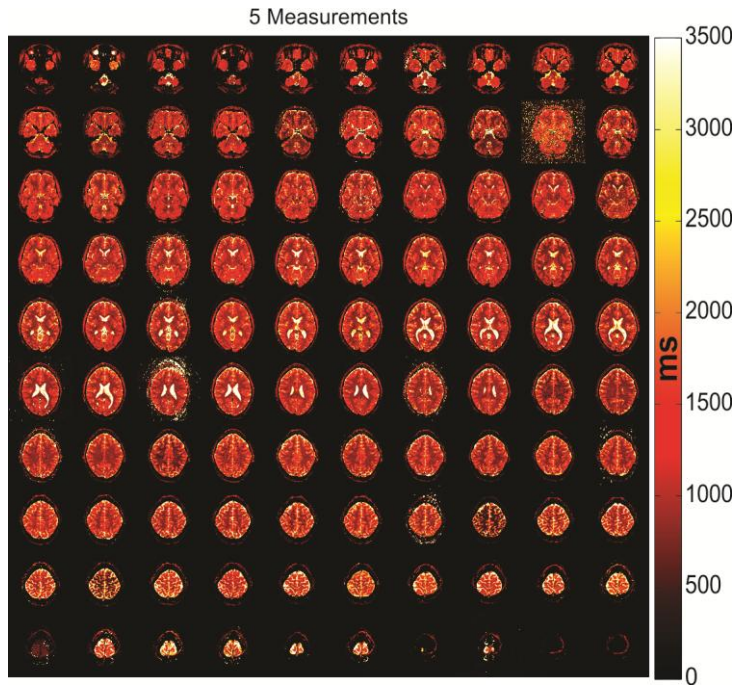

**Supporting Fig. S3.** Reconstructed  $T_1$  maps of 100 slices acquired with the optimized 5-measurement protocol.

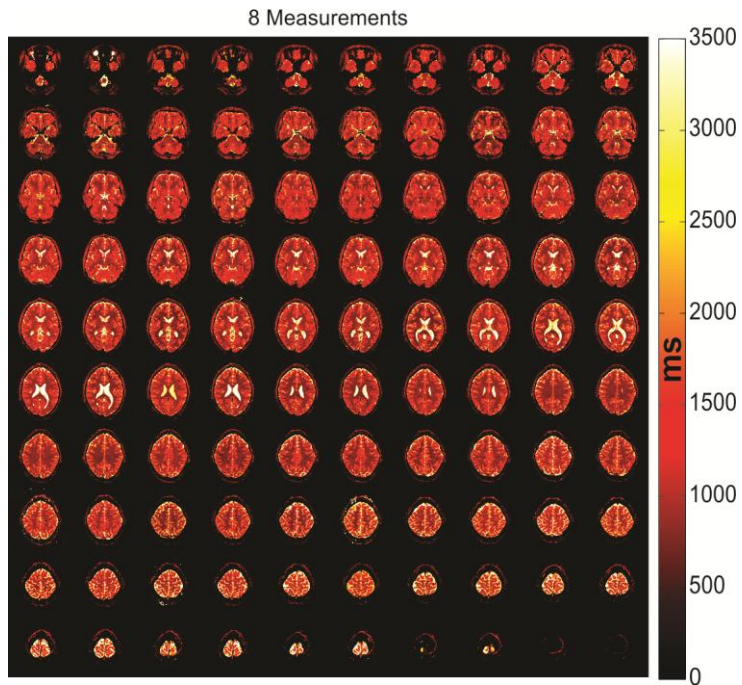

**Supporting Fig. S4.** Reconstructed  $T_1$  maps of 100 slices acquired with the optimized 8-measurement protocol.

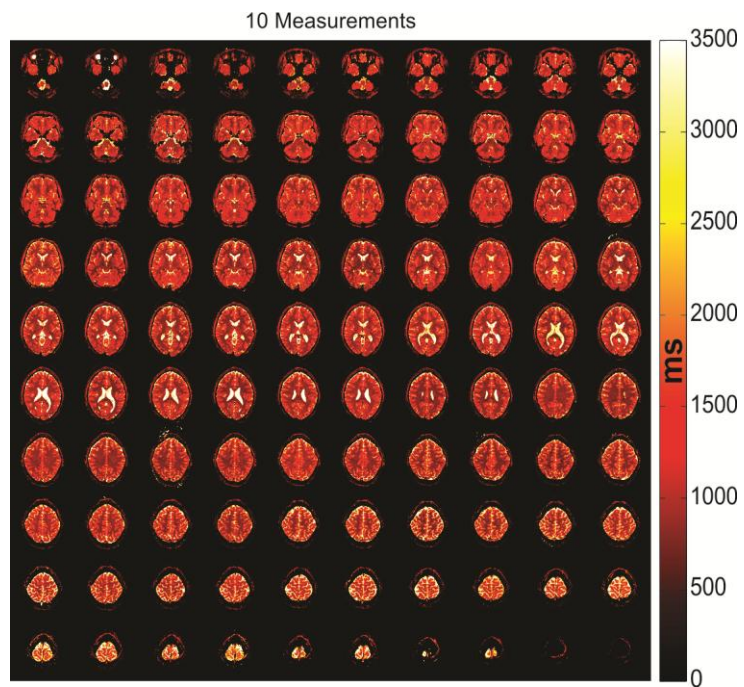

**Supporting Fig. S5.** Reconstructed  $T_1$  maps of 100 slices acquired with the optimized 10-measurement protocol.

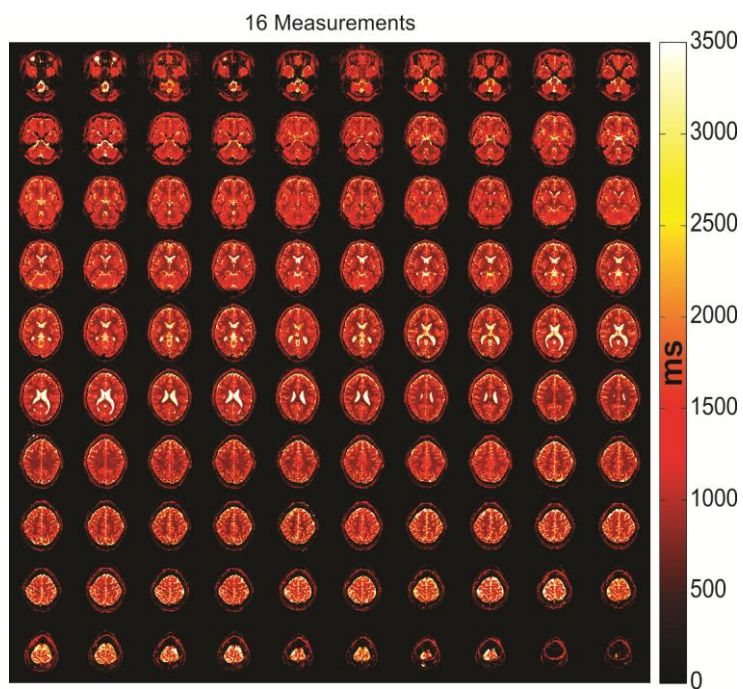

**Supporting Fig. S6.** Reconstructed  $T_1$  maps of 100 slices acquired with the optimized 16-measurement protocol.

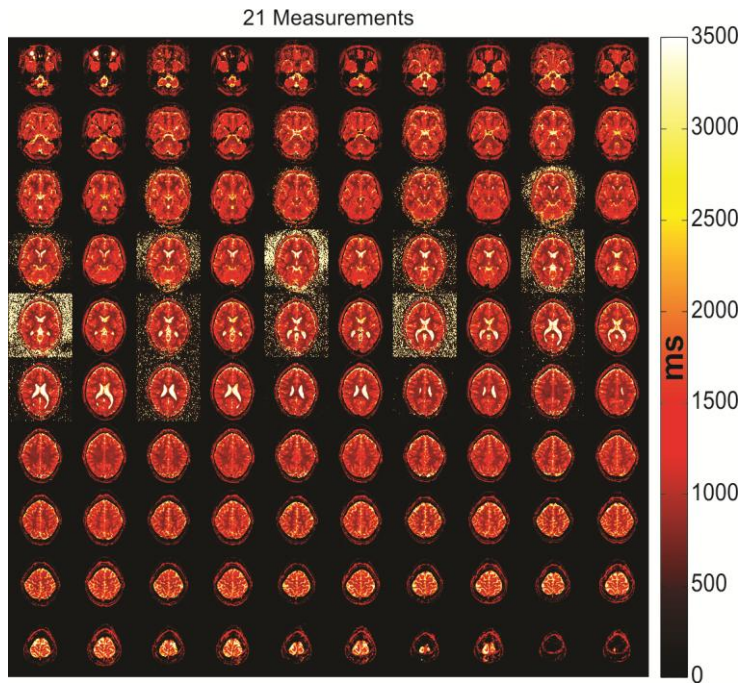

**Supporting Fig. S7.** Reconstructed T1 maps of 100 slices acquired with the unoptimized 21-measurement protocol.

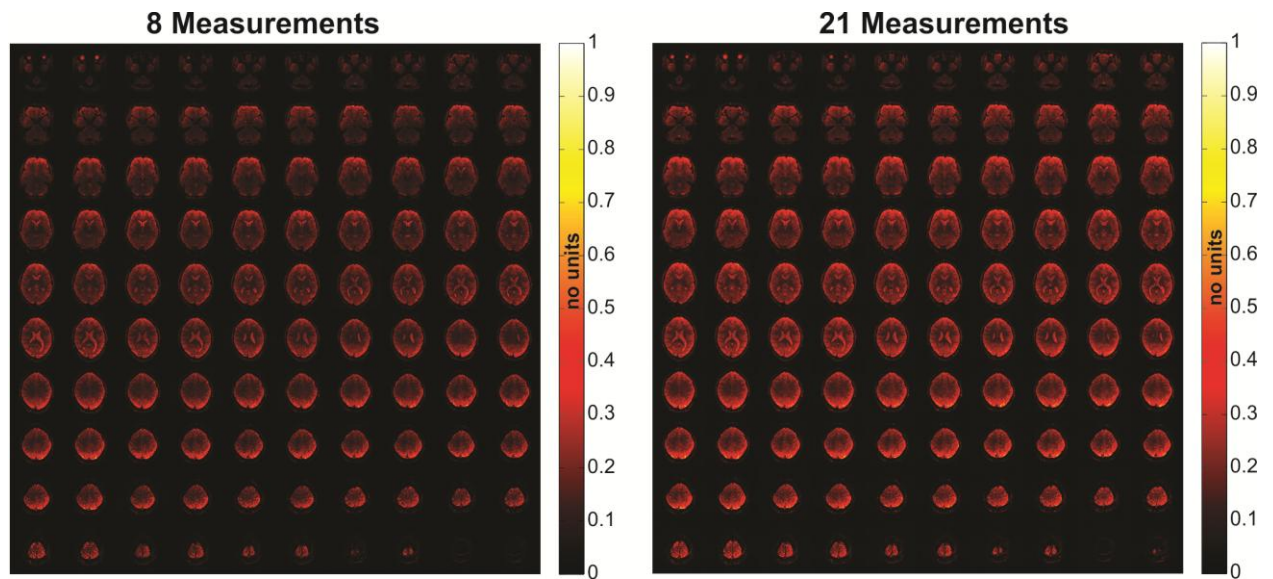

**Supporting Fig. S8.**  $S_0$  maps for the 8 measurements and 21 measurement protocols. Note the similarity between the maps obtained with the two measurements.

### Supporting Table 1

| Number of Measurements | Mean Range (ms) | Std Range (ms) |
|------------------------|-----------------|----------------|
| 4                      | 3676            | 1305           |
| 5                      | 4392            | 1119           |
| 8                      | 5250            | 874            |
| 10                     | 5482            | 700            |
| 16                     | 5875            | 512            |
| 21                     | 5499            | 1219           |

**Supporting Table 1:** Summary of the TI values sampled as a function of the number of measurements for the 100-slice protocol. The range (max–min) of TI values was computed for each individual slice, the values reported here represent the mean and standard deviation of the range across all slices for each protocol.
